## Does changes of dipeptidyl peptidase-4 and IGF binding protein 1 during cardiac rehabilitation can predict recurrent anginal pain – correlation with nitric oxide response – 3 years follow up

D. Simonovic<sup>1</sup>, M. Deljanin Ilic<sup>2</sup>, S. Ilic<sup>3</sup>, G. Kocic<sup>4</sup>, D. Petrovic<sup>1</sup>, B. Ilic<sup>1</sup>

<sup>1</sup>Institut for treatment and rehabilitation Niska Banja Cardiology clinic, Nis, Serbia; <sup>2</sup>Institute of Cardiology, Medical Faculty University of Nis, Niška Banja, Serbia, Nis, Serbia; <sup>3</sup>Internal practice Cardiopoint Nis, Nis, Serbia; <sup>4</sup>Institute of Biochemistry, Medical Faculty University of Nis, Serbia, Nis, Serbia

**Funding Acknowledgement:** Type of funding source: None

**Background:** Dipeptidyl peptidase 4 (DPP4) is a proteolytic enzyme, and its expression and activity is increased in coronary artery disease (CAD). Insulin-like growth factor binding protein 1 (IGF BP1) can affect prognosis and mortality from cardiovascular diseases.

**Purpose:** To evaluate the effects of cardiac rehabilitation on DPP4 and circulating IGF BP1 levels, also on circulating blood marker of endothelial function, nitric oxide (NOx); to assess their relationship and prognostic significance on recurrent chest pain.

**Methods:** 51 subjects; 31 pts with stable CAD (CAD group; 58.4±6.8 years) and 20 healthy controls (C group; 57.4±8.1 years) were studied. All patients underwent a supervised 3 weeks exercise training. At baseline and after 3 weeks in all pts values of DPP4, IGF BP1 and NOx were determined and exercise test was performed. Clinical long-term follow-up (3 years) was performed. All medical therapy were documented, and for this analysis, we focused on recurrent anginal chest pain.

**Results:** After follow-up period there were no cardiovascular (CV) hard end points (CV death, MI, stroke), however 18 pts (58%) had episodes of typical anginal chest pain while 13 pts (42%) were without anginal chest pain. Baseline value of DPP4 and IGF BP1 was significantly higher in CAD than in C group ( $P<0.01$  and  $P<0.01$ ), while NOx was lower ( $58.61\pm7.64$  vs  $77.28\pm29.86$   $\mu\text{mol/L}$   $P=0.024$ ). After 3 weeks of exercise training DPP4 decreased significantly in CAD group (from  $762.32\pm185.76$

to  $604.88\pm206.18$   $\mu\text{g/L}$ ,  $P<0.001$ ), as well as IGF BP1 ( $P=0.018$ ) and NOx increased ( $P<0.01$ ). Those changes resulted in no significant difference in DPP4, IGF BP1 and NOx after three weeks between CAD and C group. Exercise capacity (METs) at baseline was significantly lower in CAD than in C group ( $P<0.001$ ), and it significantly increase in CAD group after exercise period ( $P<0.001$ ). A positive correlation during exercise period was found between IGF BP1 decrease and NOx increase ( $r=0.790$ ,  $P<0.001$ ), between IGF BP1 decrease and DPP 4 decrease ( $r=0.880$ ,  $P<0.001$ ), between IGF BP1 decrease and METs increase ( $r=0.866$ ,  $P<0.001$ ), between DPP 4 decrease and NOx increase ( $r=0.975$ ,  $P<0.001$ ), between DPP 4 decrease and METs increase ( $r=0.718$ ,  $P<0.001$ ), and between METs increase and NOx increase ( $r=0.846$ ,  $P<0.001$ ). Univaried logistic regression analyses were performed and showed that NOx increase (OR 0.842, CI 0.562–0.944,  $p<0.01$ ), DPP4 decrease (OR 0.718, CI 0.644–0.826,  $p=0.01$ ), IGF BP1 decrease (OR 0.695, CI 0.475–0.822,  $p=0.002$ ) and METs increase (OR 0.924, CI 0.788–0.988,  $p=0.015$ ) significantly predict a 3 years period without anginal chest pain.

**Conclusion:** Residential cardiovascular rehabilitation, in patients with stable CAD, improved endothelial function. Patients with higher increase of NOx and METs, and greater reduction in DPP4 and IGF BP1 after 3 weeks of specialized cardiac rehabilitation, during 3 years follow up, were without anginal chest pain and without any CV event.
